# Supplementary material for: In vivo SELEX for Identification of Brain-penetrating Aptamers
Source: PubMed Central journal article supplement — Mol Ther Nucleic Acids. 2013 Jan 8;2(1):e67–. doi: 10.1038/mtna.2012.59 (PMC3564417; doi:10.1038/mtna.2012.59), 2013-01-08
Supplement: mtna201259x1.pdf [file mtna201259x1.pdf]

## Supplementary Table

Synthesized oligonucleotides and primers .

| Oligonucleotides                   | Sequences (5'→3')                                                           |
|------------------------------------|-----------------------------------------------------------------------------|
| RNA library                        | UAAUACGACUCACUAUAGGGAGGACGAUGCGG (N40)<br>CAGACGACUCGCCCGA                  |
| Aptamer A15                        | GGGAGGACGAUGCGGCGUAUUGCGCGAGGAUUAUCCGCUCAUCGUUG<br>UUGUUGUGCAGACGACUCGCCCGA |
| Aptamer A14                        | GGGAGGACGAUGCGGGUAGCCUUUCGGUGGUCCGUUAUCUCCA<br>CAUCACGUCUGCAGACGACUCGCCCGA  |
| Aptamer A02                        | GGGAGGACGAUGCGGCGUAUUGCGCGAGGUUAUCCGCUCAUCG<br>UUGUUGUUGUGCAGACGACUCGCCCGA  |
| Aptamer A09                        | GGGAGGACGAUGCGGUUACCUUUGUCCAGCAUGUUCGGAUUCG<br>GCACCUGGUCCCAGACGACUCGCCCGA  |
| Scrambled A15                      | GGGAGGACGAUGCGGAUACCUUGCCGCGGACUUACCGCUGACC<br>UUAUUAAAUAUCCAGACGACUCGCCCGA |
| SXFP                               | TAATACGACTCACTATAGGGAGGACGATGCGG                                            |
| SXRP                               | TCGGGCGAGTCGTCTG                                                            |
| QFP                                | TCACTATAGGGAGGACGATG                                                        |
| QRP                                | TCGGGCGAGTCGTCTG                                                            |
| Mouse GAPDH forward                | ACGGCCGCATCTTCTTGTGCA                                                       |
| Mouse GAPDH reverse                | ACGGCCAAATCCGTTACACC                                                        |
| Mouse Tie-2 forward                | GGGCAAAAATGAAGACCAGCAC                                                      |
| Mouse Tie-2 reverse                | GCATCCATCCGTAACCCATCCT                                                      |
| Mouse Occludin forward             | GCCTTTTGCTTCATCGCTTCC                                                       |
| Mouse Occludin reverse             | AAAAATGATTAAAGCAAAAGCCAC                                                    |
| Mouse Claudin-5 forward            | GCAGAGTACCGGGCACATGC                                                        |
| Mouse Claudin-5 reverse            | TAGTTCTTCTTGTCGTAATCGCC                                                     |
| Mouse 18s RNA forward              | AAACGGCTACCACATCCAAG                                                        |
| Mouse 18s RNA reward               | CAATTACAGGGCCTCGAAG                                                         |
| Dual Dig-labeled RNA probe for A15 | /5DiGN/mG/ZEN/ mAmUmA mAmUmC mCmUmC mGmCmG<br>mCmAmA mUmA/ZEN/ mC/3DiG_N/   |
